# Supplementary material for: Adenovirus-mediated delivery of herpes simplex virus thymidine kinase administration improves outcome of recurrent high-grade glioma
Source: PubMed Central journal article supplement (PMC4826211; doi:10.18632/oncotarget.6737), 2015-12-23
Supplement: oncotarget-07-4369-s001.pdf [file oncotarget-07-4369-s001.pdf]

## SUPPLEMENTARY TABLE

Supplementary Table S1: Treatments for recurrent HGG

| Treatment               | Author (year)                           | Tumor Type                               | PFS-6 rate (%)                                                         | Median PFS (months)                                       | Median OS (months)                   | Clinical Benefit (%) (CR+PR+SD)                                     |
|-------------------------|-----------------------------------------|------------------------------------------|------------------------------------------------------------------------|-----------------------------------------------------------|--------------------------------------|---------------------------------------------------------------------|
| <b>TMZ</b>              | Perry et al. (2008) <sup>17</sup>       | Recurrent GBM                            | 17% (group 1, GBM)<br>57% (group 2, GBM)                               | N/A                                                       | N/A                                  | 47.3% (group 1)<br>78.6% (group 2)                                  |
|                         | Perry et al. (2010) <sup>30</sup>       | GBM with progression                     | 23.9% (all)<br>27.3% (early)<br>7.4% (extended)<br>35.7% (rechallenge) | N/A<br>3.6 (early)<br>1.8 (extended)<br>3.7 (rechallenge) | N/A                                  | N/A<br>27.3% (early)<br>7.7% (extended)<br>37.0% (rechallenge)      |
| <b>Bevacizumab (BV)</b> |                                         |                                          |                                                                        |                                                           |                                      |                                                                     |
| BV                      | Kreisl et al. (2009) <sup>31</sup>      | Recurrent GBM                            | 29%                                                                    | 16 weeks                                                  | 31 weeks                             | 35% (CR+PR)                                                         |
| BV + CPT                | Vredenburgh et al. (2007) <sup>32</sup> | Recurrent GBM                            | 46%                                                                    | 24 weeks                                                  | 42 weeks                             | 57% (CR+PR)                                                         |
|                         | Gil et al. (2012) <sup>33</sup>         | Recurrent MG                             | N/A<br>46% (GBM)                                                       | 5.1 (all)<br>5.1 (GBM)                                    | 9 (all)<br>8.8 (GBM)                 | 71% (all)<br>67.4% (GBM)                                            |
| BV / BV + CPT           | Friedman et al. (2009) <sup>18</sup>    | Recurrent GBM in first or second relapse | 42.6% (BV)<br>50.3% (BV+CPT)                                           | 4.2 (BV)<br>5.6 (BV+CPT)                                  | 9.2 (BV)<br>8.7 (BV+CPT)             | 28.2% (BV)<br>27.2% (BV+CPT)<br>(CR+PR)                             |
| BV + CT                 | Norden et al. (2008) <sup>34</sup>      | Recurrent MG                             | 39%<br>42% (GBM)                                                       | 23.5 weeks                                                | 35.7 weeks                           | 93.2%<br>(CR+PR+MR+SD)                                              |
| BV + Nitrosourea        | Soffiatti et al. (2009) <sup>35</sup>   | Recurrent MG                             | N/A                                                                    | N/A                                                       | N/A                                  | 35% (CR+PR)                                                         |
| BV + TMZ                | Verhoeff et al. (2010) <sup>36</sup>    | Recurrent HGG                            | 17.4% (all)<br>6.7% (GBM)                                              | 13.9 weeks (all)<br>10.4 weeks (GBM)                      | 17.1 weeks (all)<br>15.7 weeks (GBM) | 20% (all)<br>16.7% (GBM)<br>(CR+PR)                                 |
| <b>Nitrosourea</b>      |                                         |                                          |                                                                        |                                                           |                                      |                                                                     |
| Lomustine               | Wick et al. (2010) <sup>37</sup>        | Recurrent GBM                            | 19.0%                                                                  | 1.6                                                       | 7.1                                  | 40.2%                                                               |
| Fotemustine (FTM)       | Paccapelo et al. (2012) <sup>38</sup>   | Recurrent or progressive GBM             | 33.1% (All)<br>24% (early)<br>28.9% (extended)<br>31.3% (rechallenge)  | N/A                                                       | N/A                                  | 47.9% (All)<br>45% (early)<br>36% (extended)<br>42.2% (rechallenge) |
| PCV                     | Brada et al. (2010) <sup>39</sup>       | Recurrent HGG                            | N/A                                                                    | 3.6                                                       | 6.7                                  | -                                                                   |
| <b>NovoTTF-100A</b>     | Stupp et al. (2012) <sup>40</sup>       | Recurrent GBM                            | 21.4%                                                                  | 2.2                                                       | 6.6                                  | 14% (CR+PR)                                                         |

Abbreviation: PFS, progression-free survival; PFS-6, 6-month progression-free survival; OS, overall survival; CR, complete response; PR, partial response; SD, stable disease; MR, minimal response; MG, malignant gliomas; GBM, glioblastoma; HGG, high grade glioma; TMZ, temozolomide; BV, bevacizumab; CT, chemotherapy; FTM, fotemustine; TTF, tumour treating fields; PCV, procarbazine + lomustine + vincristine; N/A, data not available.
